# Supplementary material for: Vitamin D deficiency and risk of acute lung injury in severe sepsis and severe trauma: a case-control study
Source: PubMed Central journal article supplement (PMC3944729; doi:10.1186/2110-5820-4-5), 2014-02-24

Appendix 1. **Flow chart of patients in study.**

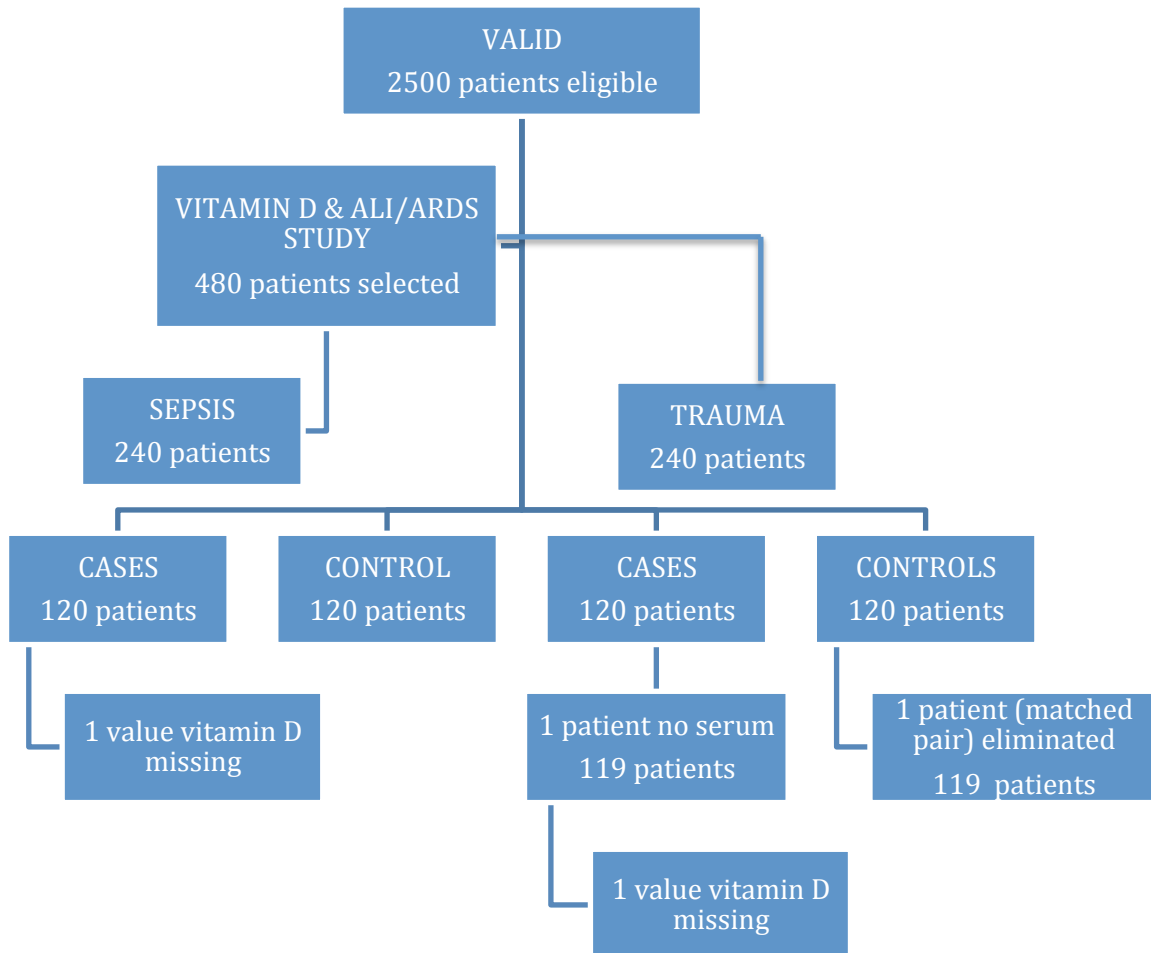

Supplement: 2110-5820-4-5-S1.pdf [file 2110-5820-4-5-S1.pdf]
